# Supplementary material for: Ex Vivo Expanded Human Vγ9Vδ2 T-Cells Can Suppress Epithelial Ovarian Cancer Cell Growth
Source: Int J Mol Sci. 2019 Mar 6;20(5):1139. doi: 10.3390/ijms20051139 (PMC6429417; doi:10.3390/ijms20051139)
Supplement: Supplementary file 1 [file ijms-20-01139-s001.pdf]

# **Supplemental Materials**

**3-5-2019 (Version 15)**

**Table S1:** *P*-values comparison between  $\gamma\delta$ -T only-treated and activated  $\alpha\beta$  T only-treated cell lines from the figure 2A results.

| E/T ratios | 0.1      | 1        | 10       | 20       |
|------------|----------|----------|----------|----------|
| SKOV3      | n.s.     | n.s.     | n.s.     | n.s.     |
| HTB75      | n.s.     | < 0.0001 | < 0.0001 | < 0.0001 |
| OVCAR3     | = 0.0005 | < 0.0001 | < 0.0001 | < 0.0001 |
| A2780      | n.s.     | n.s.     | n.s.     | n.s.     |
| A375       | n.s.     | n.s.     | < 0.0001 | < 0.0001 |
| TOV112D    | n.s.     | n.s.     | n.s.     | n.s.     |

n.s.: no significance; \* $p < 0.05$ ; \*\* $p < 0.01$ ; \*\*\* $p < 0.001$ ; \*\*\*\* $p < 0.0001$

**Table S2:** *P*-values comparison between  $\gamma\delta$ -T+PAM-treated and activated  $\alpha\beta$  T only-treated cell lines from the figure 2A results.

| E/T ratios | 0.1      | 1        | 10       | 20       |
|------------|----------|----------|----------|----------|
| SKOV3      | = 0.0017 | < 0.0001 | < 0.0001 | < 0.0001 |
| HTB75      | = 0.0356 | < 0.0001 | < 0.0001 | < 0.0001 |
| OVCAR3     | = 0.0251 | = 0.0001 | < 0.0001 | < 0.0001 |
| A2780      | = 0.0222 | = 0.0119 | < 0.0001 | < 0.0001 |
| A375       | = 0.0005 | < 0.0001 | < 0.0001 | < 0.0001 |
| TOV112D    | = 0.0008 | = 0.0001 | < 0.0001 | < 0.0001 |

\* $p < 0.05$ ; \*\* $p < 0.01$ ; \*\*\* $p < 0.001$ ; \*\*\*\* $p < 0.0001$

**A**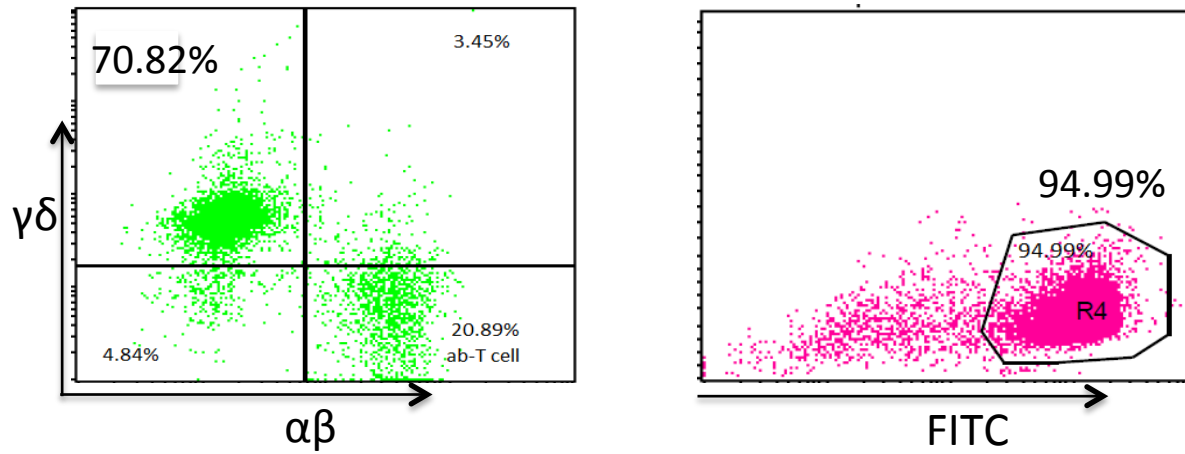**B**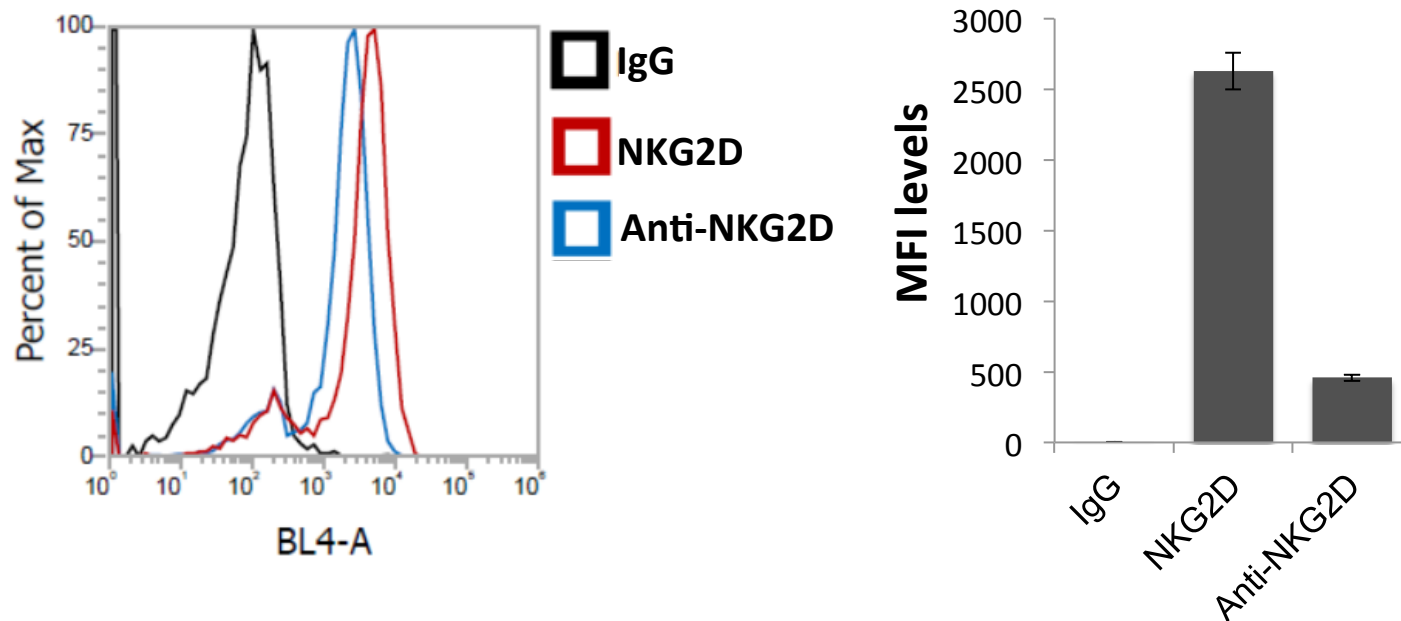

**Figure S1: The purity of  $\gamma\delta$ -T-cell isolation and the efficiency of NKG2D blockade by anti-NKG2D mAb.** (A) After a 13-days culture, expanded V $\gamma$ 9V $\delta$ 2 T-cells were at around 70.82% and were purified by positive selection using human anti-TCR  $\gamma/\delta$  T-cell MicroBeads according to the manufacture's instructions. There was around 95% purity of  $\gamma/\delta$  T-cells following isolation by a flow cytometric analysis. (B) Isolated V $\gamma$ 9V $\delta$ 2 T-cells were incubated with anti-NKG2D mAb before the addition of the indicated tumor target cells. MFI: mean fluorescence intensity.

**A****12 hrs**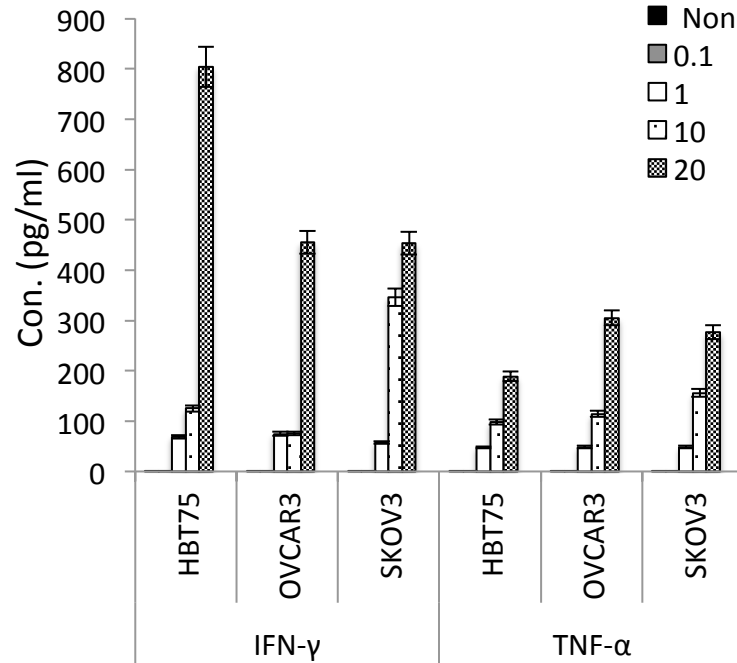**B****24 hrs**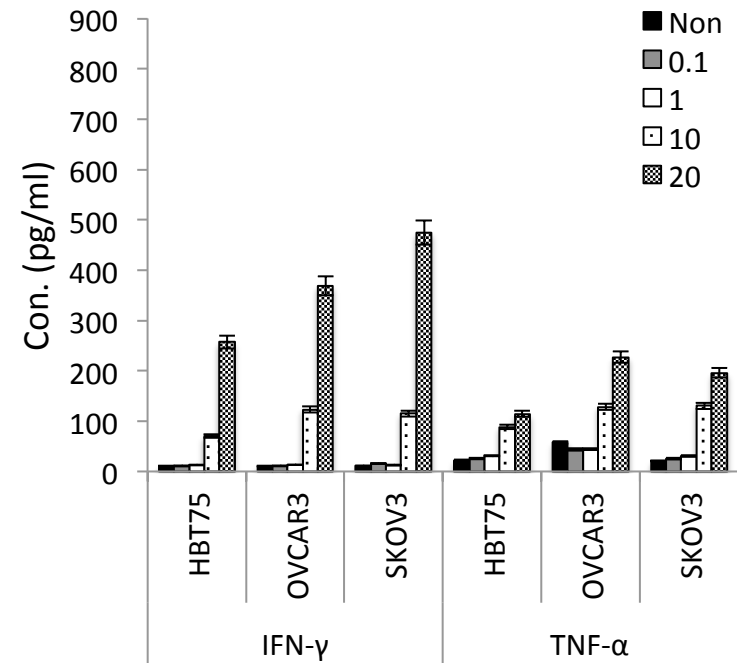

**Figure S2.** Levels of the cytokines, interferon(IFN)- $\gamma$  and tumor necrosis factor (TNF)- $\alpha$ , were detected during the  $\gamma\delta$ -T and tumor cells co-culture cytotoxicity using ELISAs.  $\gamma\delta$ -T-cell cytotoxicity performed by expansion of  $\gamma\delta$ -T-cells to tumor cells co-cultured at ratios at 0, 0.1, 1, 10 and 20. Media were harvested for IFN- $\gamma$  and TNF- $\alpha$  analyses following 12- and 24-h culture periods.

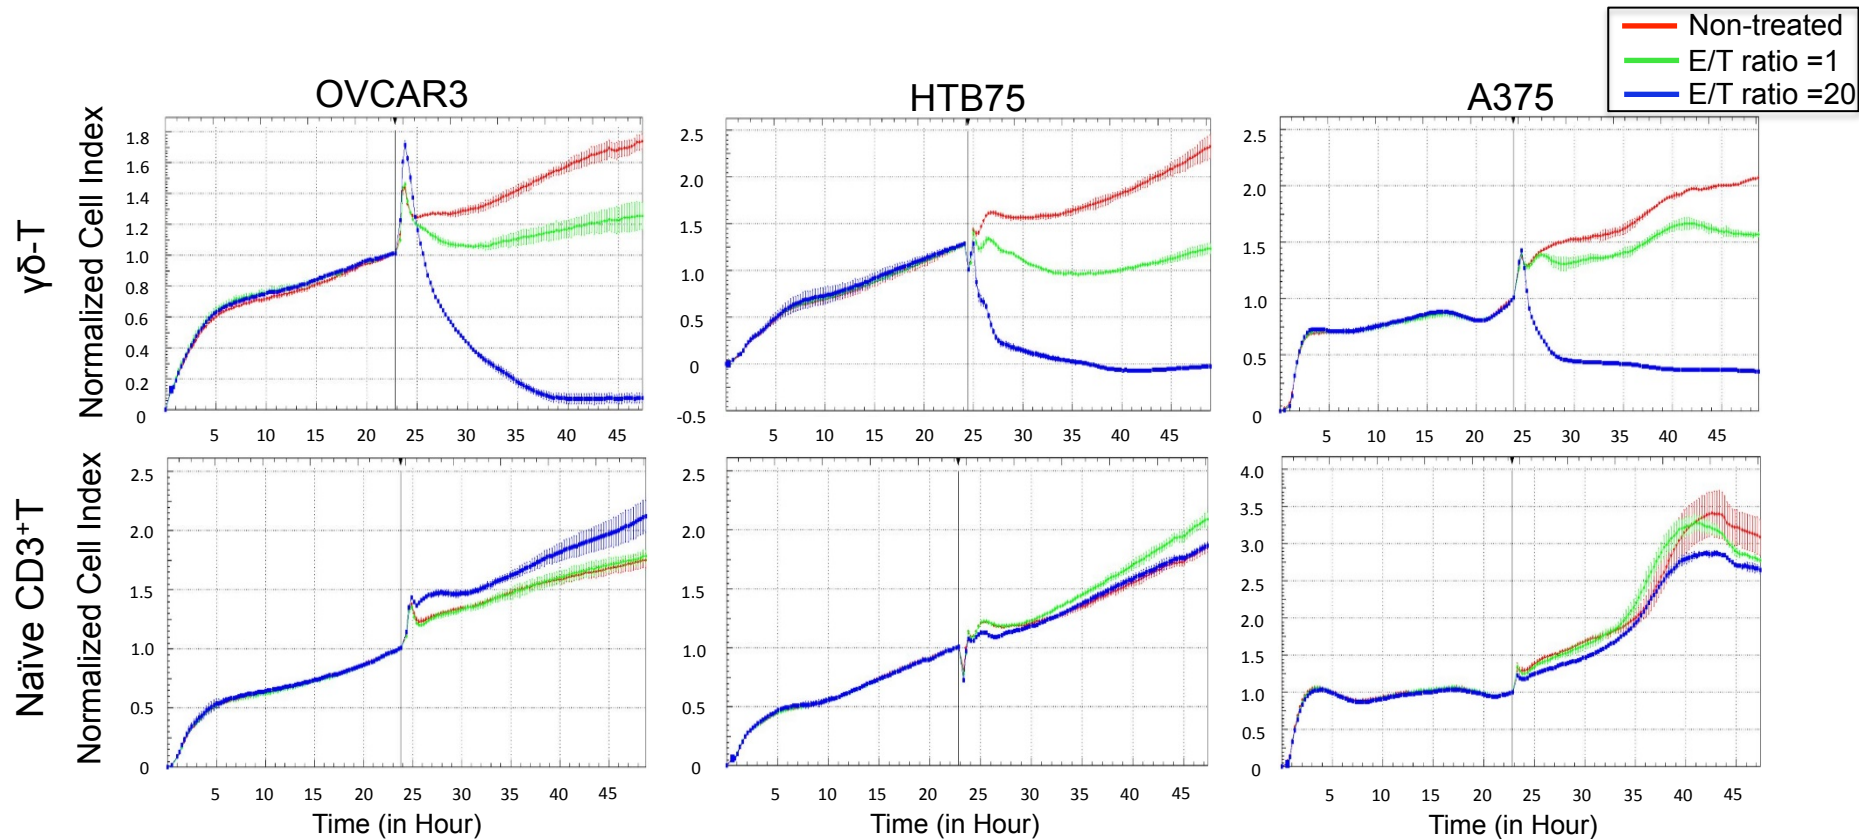

**Figure S3: Specific suppression of epithelial ovarian cancer cell lines (HTB75 and OVCAR3), and an epithelial melanoma cell line (A375) by expanded V $\gamma$ 9V $\delta$ 2 T-cells.** Standard 24-h cytotoxicity activities were performed with increasing effector (V $\gamma$ 9V $\delta$ 2 T-cells) concentrations to target E/T ratios of 0, 1, and 20 against the cancer cell lines: OVCAR3, HTB75, and A375. Cytotoxic activities were compared to the naïve CD3<sup>+</sup> T cells served as the controls of V $\gamma$ 9V $\delta$ 2 T-cells. Real-time monitoring of  $\gamma\delta$ -T cell alone-induced growth inhibition of specific OVCAR3, HTB75, and A375 cells using the x-CELLigence system. Data are presented as the mean  $\pm$  SD of three independent experiments.

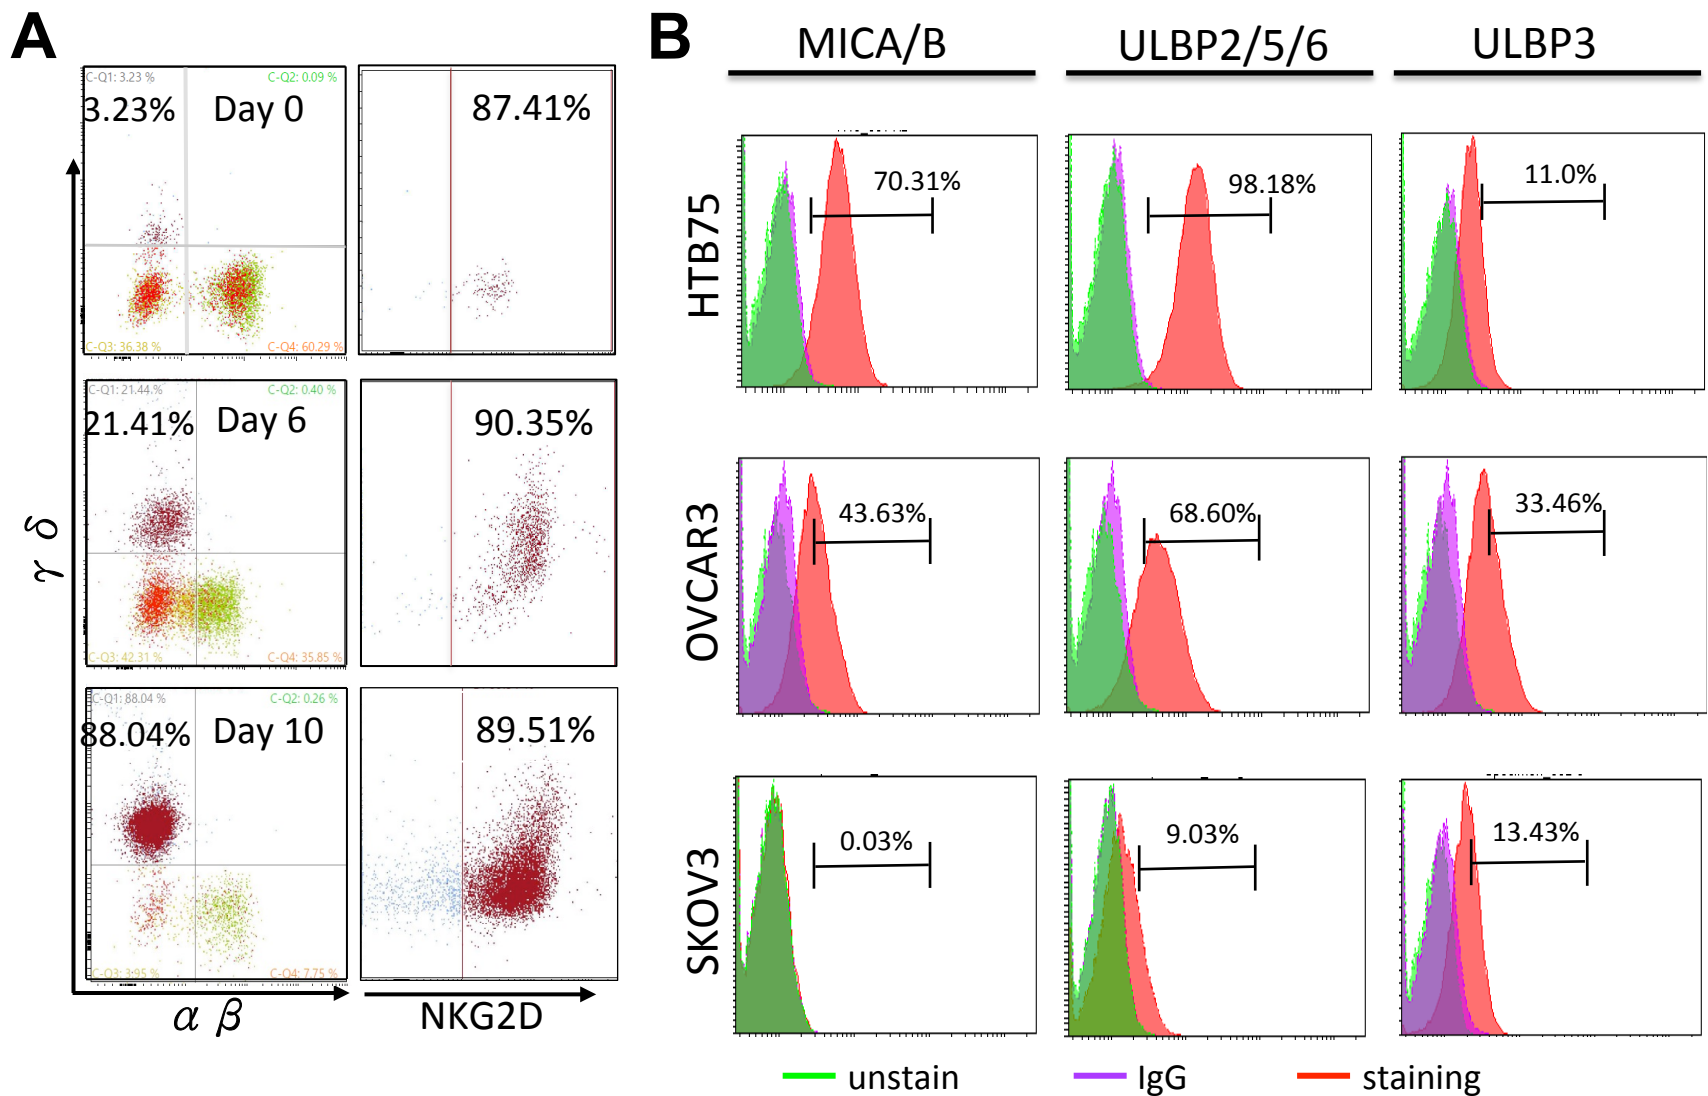

**Figure S4: Receptor-ligand interactions mediating ovarian cancer cell recognition by expanded V $\gamma$ 9V $\delta$ 2-T-cell-targeted cytotoxicity.** (A) On days 0, 6, and 10 of the expansion period, the  $\gamma\delta$ -T expanded were at 3.23%, 21.41% and 88.04%, respectively (A, left panel), whereas around 90% of the expanded V $\gamma$ 9V $\delta$ 2-T-cells showed NKG2D expression (A, right panel). (B) NKG2D ligand (NKG2DL) expression was measured in the ovarian cancer cell lines: HTB75, OVCAR3, and SKOV3. MICA/B, ULBP2/5/6, and ULBP-3 were strongly expressed by epithelial-type HTB75 and OVCAR3 cells compared to non-epithelial-type SKOV3 cells. Data are presented as the mean  $\pm$  SD of at least three independent experiments.
